# Supplementary material for: Prolonged grief: setting the research agenda
Source: PubMed Central journal article supplement (PMC4439410; doi:10.3402/ejpt.v6.27303), 2015-05-19
Supplement: EJPT-6-27303-s001.pdf [file EJPT-6-27303-s001.pdf]

## **Deuil prolongé: Mettre en place un agenda de recherche**

Rita Rosner

Contexte : Le trouble de deuil prolongé a été proposé pour la classification internationale des maladies (ICD -11), bien que rejeté comme un diagnostic par le DSM-5.

Objectif: Cette étude décrit les résultats et définit des domaines importants pour les futures recherches en s'intéressant aux effets visibles au cours de la vie.

Résultats : Le développement et l'évaluation psychométrique des mesures pour ce nouveau diagnostic sont primordiaux, en particulier pour les enfants et les adolescents. Les traitements doivent être adaptés à des sous-groupes spécifiques et les résultats de recherche doivent être diffusés dans divers milieux professionnels.

Mots-clés: deuil, deuil prolongé, deuil compliqué, traitement, diffusion

**Citation:** European Journal of Psychotraumatology 2015, 6: 27303 - <http://dx.doi.org/10.3402/ejpt.v6.27303>
