# Supplementary material for: Prolonged grief: setting the research agenda
Source: PubMed Central journal article supplement (PMC4439410; doi:10.3402/ejpt.v6.27303), 2015-05-19
Supplement: EJPT-6-27303-s002.pdf [file EJPT-6-27303-s002.pdf]

## **Elhúzóóó gyász: Mit kutassunk?**

Rita Rosner

Háttér: Az elhúzóóó gyász a tervek szerint be fog kerülni a BNO-11-be, habár a DSM-5-be nem került be.

Célkitűzés: Az irodalmi áttekintés bemutatja az eddigi eredményeket és kijelöli a legfontosabb kutatási irányt minden életszakaszt figyelembe véve.

Eredmények: Az új diagnózis mérőeszközeinek fejlesztése és pszichometriai kiértékelése elsöóóleges különösen gyermekek és serdüóók számára. A terápiaókat adaptálni szükséges a speciális csoportok számára és a kutatási eredmények disszeminációja szükséges a klinikum különböző helyszíneire.

Kulcsszavak: veszteség; elhúzóóó gyász; komplikált gyász; terápia; disszemináció

**Citation:** European Journal of Psychotraumatology 2015, 6: 27303 - <http://dx.doi.org/10.3402/ejpt.v6.27303>
