# Supplementary material for: Prolonged grief: setting the research agenda
Source: PubMed Central journal article supplement (PMC4439410; doi:10.3402/ejpt.v6.27303), 2015-05-19
Supplement: EJPT-6-27303-s003.pdf [file EJPT-6-27303-s003.pdf]

## **Duelo prolongado: Estableciendo el programa de investigación**

Rita Rosner

**Antecedentes:** Se propone el trastorno de duelo prolongado para la clasificación internacional de enfermedades (CIE-11), aunque fue rechazado como diagnóstico por el DSM-5.

**Objetivo:** Esta revisión señala los resultados y define áreas importantes de investigaciones futuras vistas desde la perspectiva del ciclo vital.

**Resultados:** Es fundamental desarrollar y evaluar psicométricamente mediciones para el nuevo diagnóstico y específicamente para niños y adolescentes. El tratamiento ha de adaptarse a los diferentes subgrupos y se han de difundir los resultados en diversos entornos profesionales.

**Palabras clave:** duelo, duelo prolongado, duelo complicado, tratamiento, difusión

**Citation:** European Journal of Psychotraumatology 2015, 6: 27303 - <http://dx.doi.org/10.3402/ejpt.v6.27303>
